# Supplementary material for: A High-Throughput Microfluidic Magnetic Separation (µFMS) Platform for Water Quality Monitoring
Source: MDPI journal article supplement (doi:10.3390/mi11010016), 2019-12-22
Supplement: s1 [file s1]

## Supplementary Materials

# A High-Throughput Microfluidic Magnetic Separation ( $\mu$ FMS) Platform for Water Quality Monitoring

Keisha Y. Castillo-Torres <sup>1</sup>, Eric S. McLamore <sup>2</sup> and David P. Arnold <sup>1,\*</sup>

<sup>1</sup> Interdisciplinary Microsystems Group, Department of Electrical and Computer Engineering; University of Florida, Gainesville, FL 32611, USA; keishact@ufl.edu

<sup>2</sup> Institute of Food and Agricultural Sciences, Department of Agricultural and Biological Engineering; University of Florida, Gainesville, FL 32611, USA; emclamore@ufl.edu

\* Correspondence: darnold@ufl.edu

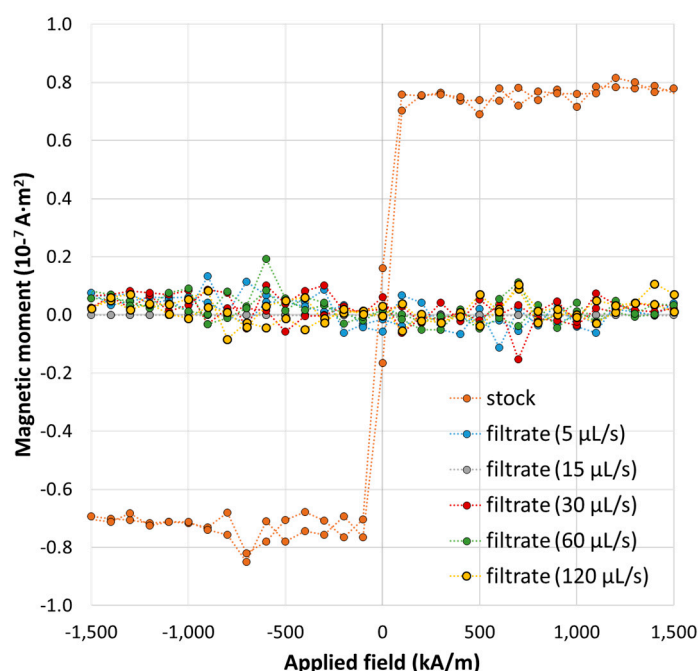

**Figure S1.** Vibrating sample magnetometer (VSM) data obtained (before and after filtration) from 0.2 mL samples filtered using the microfluidic magnetic separation ( $\mu$ FMS) device at different flow rates : 5  $\mu$ L/s, 15  $\mu$ L/s, 30  $\mu$ L/s, 60  $\mu$ L/s, and 120  $\mu$ L/s. Table S1 summarizes the saturation magnetic moment for each sample, as well as the capture efficiency (%).

**Table S1.** Summary of Capture Efficiency (%) Calculations for Microdiscs.

| Sample                          | Saturation Magnetic Moment ( $10^{-7} \text{ A}\cdot\text{m}^2$ ) |           |                            | Capture Efficiency (%) (95% CI) |
|---------------------------------|-------------------------------------------------------------------|-----------|----------------------------|---------------------------------|
|                                 | Mean                                                              | Std. Dev. | Uncertainty (95% CI; N=56) |                                 |
| stock                           | 0.745                                                             | 0.038     | 0.199                      | -                               |
| filtrate (5 $\mu\text{L/s}$ )   | 0.041                                                             | 0.029     | 0.008                      | $94.5 \pm 1.8$                  |
| filtrate (15 $\mu\text{L/s}$ )  | 0.050                                                             | 0.036     | 0.010                      | $93.3 \pm 2.2$                  |
| filtrate (30 $\mu\text{L/s}$ )  | 0.040                                                             | 0.031     | 0.008                      | $94.6 \pm 1.8$                  |
| filtrate (60 $\mu\text{L/s}$ )  | 0.037                                                             | 0.033     | 0.009                      | $95.0 \pm 1.8$                  |
| filtrate (120 $\mu\text{L/s}$ ) | 0.034                                                             | 0.026     | 0.007                      | $95.4 \pm 1.6$                  |

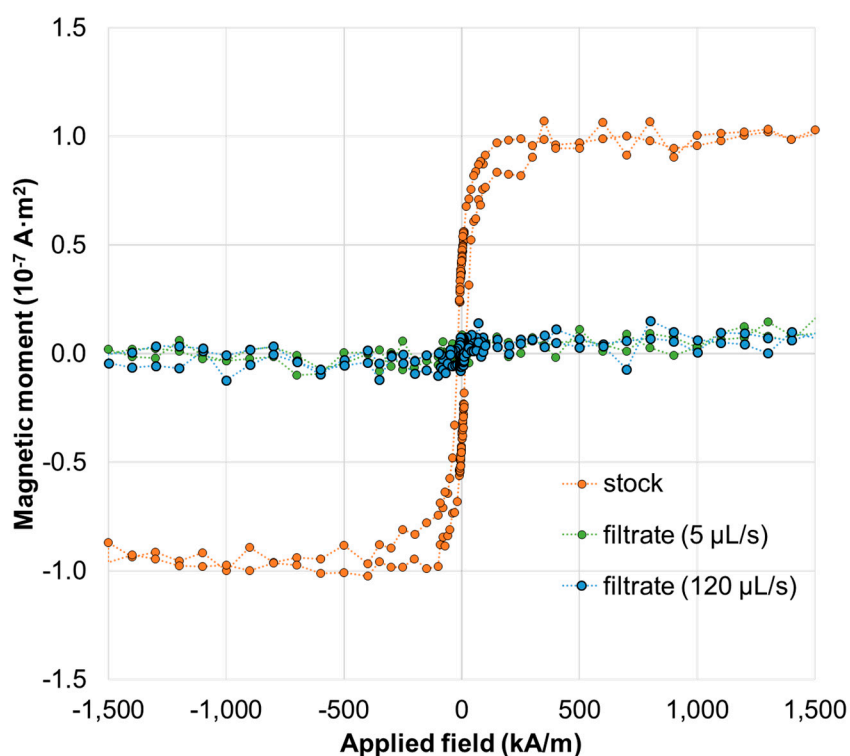**Figure S2.** VSM data obtained (before and after filtration) from 0.2 mL IONs samples filtered using the microfluidic magnetic separation ( $\mu\text{FMS}$ ) device at different flow rates: 5  $\mu\text{L/s}$  and 120  $\mu\text{L/s}$ . Table S2 summarizes the saturation magnetic moment for each sample, as well as the capture efficiency (%).**Table S2.** Summary of Capture Efficiency (%) Calculations for IONs.

| Sample                          | Saturation Magnetic Moment ( $10^{-7} \text{ A}\cdot\text{m}^2$ ) |           |                            | Capture Efficiency (%) |
|---------------------------------|-------------------------------------------------------------------|-----------|----------------------------|------------------------|
|                                 | Mean                                                              | Std. Dev. | Uncertainty (95% CI; N=40) |                        |
| stock                           | 0.972                                                             | 0.046     | 0.015                      | -                      |
| filtrate (5 $\mu\text{L/s}$ )   | 0.051                                                             | 0.041     | 0.013                      | $94.7 \pm 1.3$         |
| filtrate (120 $\mu\text{L/s}$ ) | 0.054                                                             | 0.034     | 0.011                      | $94.4 \pm 1.1$         |

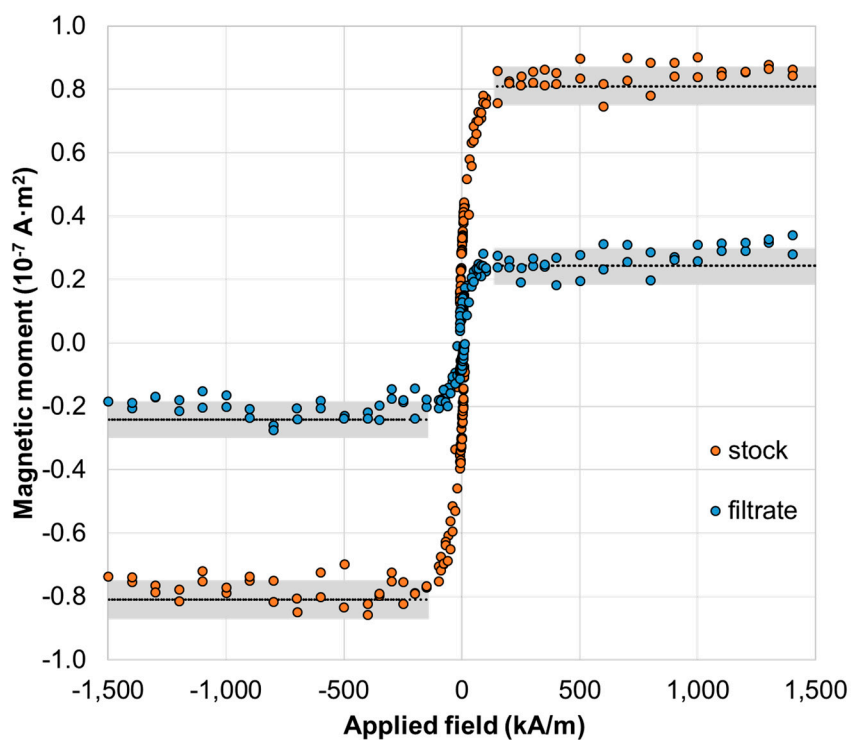

**Figure S3A.** VSM data obtained (before and after filtration) from 50 mL sample containing iron-oxide nanoparticles (IONs) at a concentration of 0.1 mg/mL filtered using the  $\mu\text{FMS}$  device at 120  $\mu\text{L/s}$ . The black dashed line represents the average saturation magnetic moment for each of the samples ( $8.10 \times 10^{-8} \text{ A} \cdot \text{m}^2$  for the 20  $\mu\text{L}$  from the stock sample, and  $2.43 \times 10^{-8} \text{ A} \cdot \text{m}^2$  for the 20  $\mu\text{L}$  from the filtrate sample), which resulted in the 70.0% capture efficiency.

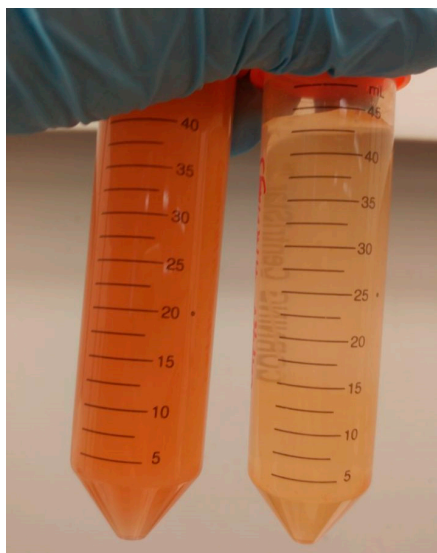

**Figure S3B.** Images of 50 mL sample (A) before and (B) after filtration using the  $\mu\text{FMS}$  device at 120  $\mu\text{L/s}$ .

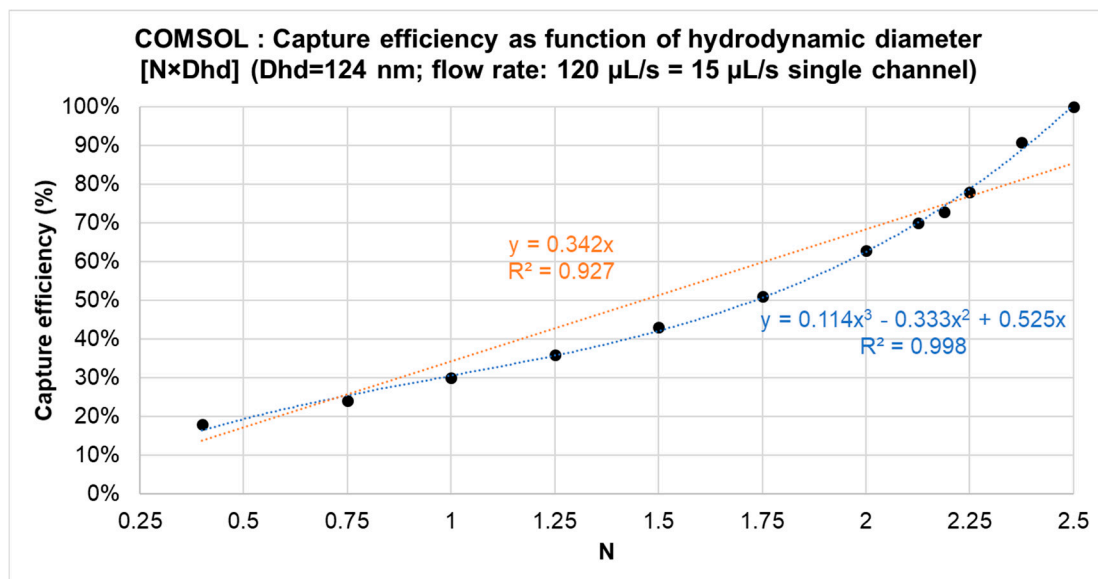

**Figure S4.** Plot of simulated capture efficiencies (COMSOL) as a function of change in hydrodynamic diameter of IONs, considering possible aggregation of particles. It is shown how the capture efficiency increases as the hydrodynamic/magnetic diameter increases.
